# Supplementary material for: Single-cell imaging and transcriptomic analyses of endogenous cardiomyocyte dedifferentiation and cycling
Source: Cell Discov. 2019 Jun 4;5:30. doi: 10.1038/s41421-019-0095-9 (PMC6547664; doi:10.1038/s41421-019-0095-9)
Supplement: Supplementary file 7 — Supplementary Table S6 [file 41421_2019_95_MOESM7_ESM.xlsx]

## Sheet: Table S6 Pathways Enrichemnt by
Gene set	Description	Enrichment score	P-value	Genes in list	Genes not in list	Genes in list, not in set	Genes not in list, not in set
path:mmu03440	Homologous recombination	38.6726	1.60211e-17	18	24	211	7759
path:mmu04110	Cell cycle	36.974	8.75783e-17	27	99	202	7684
path:mmu03460	Fanconi anemia pathway	23.2161	8.26791e-11	14	37	215	7746
path:mmu03030	DNA replication	20.0992	1.86653e-09	11	24	218	7759
path:mmu04914	Progesterone-mediated oocyte maturation	13.4696	1.41322e-06	13	77	216	7706
path:mmu04114	Oocyte meiosis	12.315	4.48414e-06	14	101	215	7682
path:mmu00240	Pyrimidine metabolism	12.0345	5.9358e-06	13	89	216	7694
path:mmu03430	Mismatch repair	10.5594	2.59496e-05	6	16	223	7767
path:mmu03410	Base excision repair	10.1373	3.95758e-05	7	27	222	7756
path:mmu05206	MicroRNAs in cancer	9.57826	6.92172e-05	14	132	215	7651
path:mmu05166	Human T-cell leukemia virus 1 infection	9.15796	0.000105378	20	254	209	7529
path:mmu04218	Cellular senescence	7.49423	0.000556287	14	164	215	7619
path:mmu03420	Nucleotide excision repair	6.65784	0.00128392	6	37	223	7746
path:mmu00670	One carbon pool by folate	6.32181	0.00179668	4	15	225	7768
path:mmu00230	Purine metabolism	6.26396	0.00190368	13	167	216	7616
path:mmu05224	Breast cancer	5.59359	0.00372163	11	139	218	7644
path:mmu04115	p53 signaling pathway	5.29178	0.0050328	7	67	222	7716
path:mmu03013	RNA transport	4.92677	0.00724985	11	153	218	7630
path:mmu05416	Viral myocarditis	2.72108	0.0658034	5	71	224	7712
path:mmu01524	Platinum drug resistance	2.67632	0.0688156	5	72	224	7711
path:mmu05203	Viral carcinogenesis	2.26722	0.1036	10	212	219	7571
path:mmu05217	Basal cell carcinoma	2.20853	0.109862	4	60	225	7723
path:mmu05170	Human immunodeficiency virus 1 infection	2.11795	0.120278	10	219	219	7564
path:mmu05225	Hepatocellular carcinoma	2.10143	0.122281	8	165	221	7618
path:mmu00514	Other types of O-glycan biosynthesis	1.97175	0.139213	2	21	227	7762
path:mmu05226	Gastric cancer	1.93336	0.144661	7	145	222	7638
path:mmu00534	Glycosaminoglycan biosynthesis - heparan sulfate / heparin	1.90284	0.149144	2	22	227	7761
path:mmu04917	Prolactin signaling pathway	1.86127	0.155476	4	69	225	7714
path:mmu00440	Phosphonate and phosphinate metabolism	1.83419	0.159742	1	5	228	7778
path:mmu05212	Pancreatic cancer	1.79302	0.166456	4	71	225	7712
path:mmu04934	Cushing syndrome	1.70708	0.181395	7	155	222	7628
path:mmu05330	Allograft rejection	1.68539	0.185371	3	49	226	7734
path:mmu04068	FoxO signaling pathway	1.66522	0.189149	6	129	223	7654
path:mmu05323	Rheumatoid arthritis	1.63455	0.195039	4	76	225	7707
path:mmu04210	Apoptosis	1.61985	0.197929	6	131	223	7652
path:mmu05332	Graft-versus-host disease	1.60949	0.19999	3	51	226	7732
path:mmu04931	Insulin resistance	1.55445	0.211306	5	106	224	7677
path:mmu04120	Ubiquitin mediated proteolysis	1.55411	0.211377	6	134	223	7649
path:mmu04910	Insulin signaling pathway	1.5328	0.215931	6	135	223	7648
path:mmu04650	Natural killer cell mediated cytotoxicity	1.50667	0.221646	5	108	224	7675
path:mmu00630	Glyoxylate and dicarboxylate metabolism	1.50654	0.221676	2	29	227	7754
path:mmu04540	Gap junction	1.46473	0.231141	4	82	225	7701
path:mmu04215	Apoptosis - multiple species	1.45971	0.232304	2	30	227	7753
path:mmu04940	Type I diabetes mellitus	1.43713	0.23761	3	56	226	7727
path:mmu01523	Antifolate resistance	1.41485	0.242963	2	31	227	7752
path:mmu00310	Lysine degradation	1.3744	0.252992	3	58	226	7725
path:mmu05163	Human cytomegalovirus infection	1.3197	0.267216	9	236	220	7547
path:mmu01522	Endocrine resistance	1.2906	0.275104	4	89	225	7694
path:mmu04390	Hippo signaling pathway	1.26314	0.282765	6	149	223	7634
path:mmu00480	Glutathione metabolism	1.25829	0.284141	3	62	226	7721
path:mmu05320	Autoimmune thyroid disease	1.20449	0.299844	3	64	226	7719
path:mmu03450	Non-homologous end-joining	1.15751	0.314268	1	12	228	7771
path:mmu05219	Bladder cancer	1.14687	0.317631	2	38	227	7745
path:mmu04933	AGE-RAGE signaling pathway in diabetic complications	1.13846	0.320313	4	96	225	7687
path:mmu04916	Melanogenesis	1.09854	0.333356	4	98	225	7685
path:mmu04216	Ferroptosis	1.08253	0.338737	2	40	227	7743
path:mmu05214	Glioma	1.08105	0.33924	3	69	226	7714
path:mmu00730	Thiamine metabolism	1.04137	0.352971	1	14	228	7769
path:mmu00562	Inositol phosphate metabolism	1.03569	0.354982	3	71	226	7712
path:mmu05205	Proteoglycans in cancer	1.03197	0.356303	7	195	222	7588
path:mmu04520	Adherens junction	1.0138	0.362837	3	72	226	7711
path:mmu05100	Bacterial invasion of epithelial cells	1.0138	0.362837	3	72	226	7711
path:mmu05168	Herpes simplex infection	1.00594	0.365701	7	197	222	7586
path:mmu05220	Chronic myeloid leukemia	0.992421	0.370678	3	73	226	7710
path:mmu05144	Malaria	0.9146	0.400677	2	46	227	7737
path:mmu03008	Ribosome biogenesis in eukaryotes	0.911702	0.40184	3	77	226	7706
path:mmu04612	Antigen processing and presentation	0.911702	0.40184	3	77	226	7706
path:mmu00450	Selenocompound metabolism	0.898977	0.406986	1	17	228	7766
path:mmu02010	ABC transporters	0.889777	0.410747	2	47	227	7736
path:mmu01521	EGFR tyrosine kinase inhibitor resistance	0.874036	0.417264	3	79	226	7704
path:mmu00270	Cysteine and methionine metabolism	0.865753	0.420735	2	48	227	7735
path:mmu04072	Phospholipase D signaling pathway	0.861053	0.422717	5	144	224	7639
path:mmu05169	Epstein-Barr virus infection	0.840008	0.431707	7	211	222	7572
path:mmu00100	Steroid biosynthesis	0.819898	0.440477	1	19	228	7764
path:mmu00220	Arginine biosynthesis	0.819898	0.440477	1	19	228	7764
path:mmu04150	mTOR signaling pathway	0.808949	0.445326	5	148	224	7635
path:mmu04020	Calcium signaling pathway	0.807804	0.445836	6	181	223	7602
path:mmu04012	ErbB signaling pathway	0.803616	0.447707	3	83	226	7700
path:mmu03320	PPAR signaling pathway	0.786972	0.455221	3	84	226	7699
path:mmu00983	Drug metabolism - other enzymes	0.786972	0.455221	3	84	226	7699
path:mmu05165	Human papillomavirus infection	0.772636	0.461794	11	351	218	7432
path:mmu04514	Cell adhesion molecules (CAMs)	0.748081	0.473274	5	153	224	7630
path:mmu00140	Steroid hormone biosynthesis	0.73919	0.477501	3	87	226	7696
path:mmu05034	Alcoholism	0.731454	0.481209	6	188	223	7595
path:mmu04964	Proximal tubule bicarbonate reclamation	0.719051	0.487214	1	22	228	7761
path:mmu00900	Terpenoid backbone biosynthesis	0.719051	0.487214	1	22	228	7761
path:mmu04657	IL-17 signaling pathway	0.709035	0.492119	3	89	226	7694
path:mmu00515	Mannose type O-glycan biosynthesis	0.689328	0.501913	1	23	228	7760
path:mmu04926	Relaxin signaling pathway	0.680487	0.50637	4	125	225	7658
path:mmu05222	Small cell lung cancer	0.680163	0.506534	3	91	226	7692
path:mmu04145	Phagosome	0.639227	0.5277	5	163	224	7620
path:mmu04713	Circadian entrainment	0.639123	0.527755	3	94	226	7689
path:mmu04726	Serotonergic synapse	0.633882	0.530528	4	129	225	7654
path:mmu04915	Estrogen signaling pathway	0.633882	0.530528	4	129	225	7654
path:mmu04744	Phototransduction	0.609653	0.543539	1	26	228	7757
path:mmu04977	Vitamin digestion and absorption	0.585854	0.55663	1	27	228	7756
path:mmu00650	Butanoate metabolism	0.585854	0.55663	1	27	228	7756
path:mmu00790	Folate biosynthesis	0.585854	0.55663	1	27	228	7756
path:mmu01040	Biosynthesis of unsaturated fatty acids	0.585854	0.55663	1	27	228	7756
path:mmu05322	Systemic lupus erythematosus	0.580007	0.559894	4	134	225	7649
path:mmu00010	Glycolysis / Gluconeogenesis	0.567243	0.567087	2	64	227	7719
path:mmu04550	Signaling pathways regulating pluripotency of stem cells	0.549854	0.577034	4	137	225	7646
path:mmu05200	Pathways in cancer	0.540985	0.582174	15	524	214	7259
path:mmu03020	RNA polymerase	0.521379	0.593701	1	30	228	7753
path:mmu05418	Fluid shear stress and atherosclerosis	0.521226	0.593792	4	140	225	7643
path:mmu00030	Pentose phosphate pathway	0.501933	0.605359	1	31	228	7752
path:mmu00062	Fatty acid elongation	0.501933	0.605359	1	31	228	7752
path:mmu00640	Propanoate metabolism	0.501933	0.605359	1	31	228	7752
path:mmu05202	Transcriptional misregulation in cancer	0.495652	0.609174	5	179	224	7604
path:mmu04310	Wnt signaling pathway	0.494041	0.610156	4	143	225	7640
path:mmu05412	Arrhythmogenic right ventricular cardiomyopathy (ARVC)	0.486601	0.614712	2	70	227	7713
path:mmu05143	African trypanosomiasis	0.483398	0.616684	1	32	228	7751
path:mmu04668	TNF signaling pathway	0.478609	0.619645	3	108	226	7675
path:mmu04976	Bile secretion	0.474413	0.62225	2	71	227	7712
path:mmu04260	Cardiac muscle contraction	0.45101	0.636985	2	73	227	7710
path:mmu04971	Gastric acid secretion	0.45101	0.636985	2	73	227	7710
path:mmu04062	Chemokine signaling pathway	0.450087	0.637573	5	185	224	7598
path:mmu00760	Nicotinate and nicotinamide metabolism	0.448833	0.638373	1	34	228	7749
path:mmu00051	Fructose and mannose metabolism	0.432702	0.648754	1	35	228	7748
path:mmu01230	Biosynthesis of amino acids	0.407817	0.665101	2	77	227	7706
path:mmu00250	Alanine, aspartate and glutamate metabolism	0.402517	0.668635	1	37	228	7746
path:mmu00620	Pyruvate metabolism	0.402517	0.668635	1	37	228	7746
path:mmu01200	Carbon metabolism	0.373674	0.688202	3	120	226	7663
path:mmu04510	Focal adhesion	0.370421	0.690444	5	197	224	7586
path:mmu04750	Inflammatory mediator regulation of TRP channels	0.351224	0.703826	3	123	226	7660
path:mmu04911	Insulin secretion	0.351026	0.703966	2	83	227	7700
path:mmu05410	Hypertrophic cardiomyopathy (HCM)	0.351026	0.703966	2	83	227	7700
path:mmu04630	JAK-STAT signaling pathway	0.344648	0.708469	4	163	225	7620
path:mmu01100	Metabolic pathways	0.344292	0.708722	36	1316	193	6467
path:mmu03022	Basal transcription factors	0.337473	0.713571	1	42	228	7741
path:mmu04152	AMPK signaling pathway	0.337001	0.713908	3	125	226	7658
path:mmu05167	Kaposi sarcoma-associated herpesvirus infection	0.335696	0.714841	5	203	224	7580
path:mmu05210	Colorectal cancer	0.317805	0.727745	2	87	227	7696
path:mmu05414	Dilated cardiomyopathy (DCM)	0.317805	0.727745	2	87	227	7696
path:mmu00970	Aminoacyl-tRNA biosynthesis	0.314988	0.729798	1	44	228	7739
path:mmu04742	Taste transduction	0.31002	0.733432	2	88	227	7695
path:mmu04640	Hematopoietic cell lineage	0.302432	0.739019	2	89	227	7694
path:mmu04810	Regulation of actin cytoskeleton	0.298999	0.74156	5	210	224	7573
path:mmu04217	Necroptosis	0.292484	0.746407	4	172	225	7611
path:mmu05032	Morphine addiction	0.287824	0.749893	2	91	227	7692
path:mmu00830	Retinol metabolism	0.287824	0.749893	2	91	227	7692
path:mmu04330	Notch signaling pathway	0.275022	0.759555	1	48	228	7735
path:mmu00591	Linoleic acid metabolism	0.275022	0.759555	1	48	228	7735
path:mmu04360	Axon guidance	0.27178	0.762022	4	176	225	7607
path:mmu00600	Sphingolipid metabolism	0.26596	0.76647	1	49	228	7734
path:mmu04010	MAPK signaling pathway	0.26571	0.766661	7	295	222	7488
path:mmu00510	N-Glycan biosynthesis	0.257235	0.773187	1	50	228	7733
path:mmu04064	NF-kappa B signaling pathway	0.254385	0.775393	2	96	227	7687
path:mmu05014	Amyotrophic lateral sclerosis (ALS)	0.248832	0.779711	1	51	228	7732
path:mmu04070	Phosphatidylinositol signaling system	0.248188	0.780213	2	97	227	7686
path:mmu05231	Choline metabolism in cancer	0.248188	0.780213	2	97	227	7686
path:mmu05161	Hepatitis B	0.241774	0.785234	3	141	226	7642
path:mmu04972	Pancreatic secretion	0.23625	0.789583	2	99	227	7684
path:mmu05150	Staphylococcus aureus infection	0.232936	0.792204	1	53	228	7730
path:mmu04932	Non-alcoholic fatty liver disease (NAFLD)	0.231893	0.793031	3	143	226	7640
path:mmu01212	Fatty acid metabolism	0.225416	0.798184	1	54	228	7729
path:mmu04370	VEGF signaling pathway	0.204427	0.815114	1	57	228	7726
path:mmu05213	Endometrial cancer	0.197918	0.820437	1	58	228	7725
path:mmu04921	Oxytocin signaling pathway	0.192054	0.825262	3	152	226	7631
path:mmu04623	Cytosolic DNA-sensing pathway	0.179716	0.835508	1	61	228	7722
path:mmu04730	Long-term depression	0.174061	0.840246	1	62	228	7721
path:mmu04670	Leukocyte transendothelial migration	0.171577	0.842335	2	112	227	7671
path:mmu04060	Cytokine-cytokine receptor interaction	0.168505	0.844927	6	285	223	7498
path:mmu04720	Long-term potentiation	0.158222	0.85366	1	65	228	7718
path:mmu05223	Non-small cell lung cancer	0.158222	0.85366	1	65	228	7718
path:mmu05010	Alzheimer disease	0.15552	0.85597	3	162	226	7621
path:mmu04724	Glutamatergic synapse	0.151725	0.859225	2	117	227	7666
path:mmu04530	Tight junction	0.149061	0.861516	3	164	226	7619
path:mmu05164	Influenza A	0.149061	0.861516	3	164	226	7619
path:mmu04714	Thermogenesis	0.140952	0.868531	4	211	225	7572
path:mmu04071	Sphingolipid signaling pathway	0.140929	0.868551	2	120	227	7663
path:mmu04722	Neurotrophin signaling pathway	0.140929	0.868551	2	120	227	7663
path:mmu05211	Renal cell carcinoma	0.139472	0.869818	1	69	228	7714
path:mmu04924	Renin secretion	0.135165	0.873571	1	70	228	7713
path:mmu04927	Cortisol synthesis and secretion	0.135165	0.873571	1	70	228	7713
path:mmu04920	Adipocytokine signaling pathway	0.126972	0.880759	1	72	228	7711
path:mmu04142	Lysosome	0.121571	0.885528	2	126	227	7657
path:mmu04918	Thyroid hormone synthesis	0.119303	0.887539	1	74	228	7709
path:mmu05218	Melanoma	0.115654	0.890784	1	75	228	7708
path:mmu04970	Salivary secretion	0.102192	0.902857	1	79	228	7704
path:mmu05016	Huntington disease	0.101406	0.903566	3	182	226	7601
path:mmu04371	Apelin signaling pathway	0.0997933	0.905024	2	134	227	7649
path:mmu04014	Ras signaling pathway	0.0956478	0.908784	4	231	225	7552
path:mmu04512	ECM-receptor interaction	0.0931786	0.911031	1	82	228	7701
path:mmu04723	Retrograde endocannabinoid signaling	0.0881847	0.915592	2	139	227	7644
path:mmu03018	RNA degradation	0.0876342	0.916096	1	84	228	7699
path:mmu04666	Fc gamma R-mediated phagocytosis	0.0876342	0.916096	1	84	228	7699
path:mmu04350	TGF-beta signaling pathway	0.0849918	0.91852	1	85	228	7698
path:mmu04610	Complement and coagulation cascades	0.0799523	0.92316	1	87	228	7696
path:mmu04261	Adrenergic signaling in cardiomyocytes	0.0798628	0.923243	2	143	227	7640
path:mmu04211	Longevity regulating pathway	0.0752218	0.927538	1	89	228	7694
path:mmu00590	Arachidonic acid metabolism	0.0752218	0.927538	1	89	228	7694
path:mmu04080	Neuroactive ligand-receptor interaction	0.0748462	0.927886	5	289	224	7494
path:mmu03015	mRNA surveillance pathway	0.0686616	0.933643	1	92	228	7691
path:mmu05204	Chemical carcinogenesis	0.0646184	0.937425	1	94	228	7689
path:mmu00564	Glycerophospholipid metabolism	0.0608196	0.940993	1	96	228	7687
path:mmu05215	Prostate cancer	0.0572497	0.944358	1	98	228	7685
path:mmu05142	Chagas disease (American trypanosomiasis)	0.0538942	0.947532	1	100	228	7683
path:mmu04922	Glucagon signaling pathway	0.0522926	0.949051	1	101	228	7682
path:mmu04144	Endocytosis	0.0514395	0.949861	4	262	225	7521
path:mmu04925	Aldosterone synthesis and secretion	0.0492337	0.951959	1	103	228	7680
path:mmu04066	HIF-1 signaling pathway	0.0477734	0.95335	1	104	228	7679
path:mmu05146	Amoebiasis	0.0477734	0.95335	1	104	228	7679
path:mmu04621	NOD-like receptor signaling pathway	0.0427858	0.958117	2	168	227	7615
path:mmu04928	Parathyroid hormone synthesis, secretion and action	0.0423599	0.958525	1	108	228	7675
path:mmu05152	Tuberculosis	0.0367856	0.963883	2	174	227	7609
path:mmu04725	Cholinergic synapse	0.0364599	0.964197	1	113	228	7670
path:mmu04919	Thyroid hormone signaling pathway	0.0333272	0.967222	1	116	228	7667
path:mmu00190	Oxidative phosphorylation	0.0313915	0.969096	1	118	228	7665
path:mmu04380	Osteoclast differentiation	0.0278543	0.97253	1	122	228	7661
path:mmu05012	Parkinson disease	0.024719	0.975584	1	126	228	7657
path:mmu04270	Vascular smooth muscle contraction	0.0239924	0.976293	1	127	228	7656
path:mmu04024	cAMP signaling pathway	0.0221412	0.978102	2	194	227	7589
path:mmu04728	Dopaminergic synapse	0.0206696	0.979543	1	132	228	7651
path:mmu03040	Spliceosome	0.0200628	0.980137	1	133	228	7650
path:mmu04015	Rap1 signaling pathway	0.0132435	0.986844	2	214	227	7569
path:mmu04022	cGMP-PKG signaling pathway	0.00774353	0.992286	1	165	228	7618
path:mmu04151	PI3K-Akt signaling pathway	0.00636938	0.993651	4	359	225	7424
path:mmu04740	Olfactory transduction	2.17575e-08	1	8	1102	221	6681
