# Supplementary material for: Single-cell imaging and transcriptomic analyses of endogenous cardiomyocyte dedifferentiation and cycling
Source: Cell Discov. 2019 Jun 4;5:30. doi: 10.1038/s41421-019-0095-9 (PMC6547664; doi:10.1038/s41421-019-0095-9)
Supplement: Supplementary file 9 — Supplementary Table S8 [file 41421_2019_95_MOESM9_ESM.xlsx]

## Sheet: Sheet1
Supplementary Table S8. RT-qPCR primers for gene expression analysis.
Gene	Forward Primer (5’… 3’)	Reverse Primer (5’… 3’)
Ccnb1	ACGGGCATTCCTCTTCCCCT	TACCACAGGGTCACCACCTCA
Cdk2	ACGGGCATTCCTCTTCCCCT	TACCACAGGGTCACCACCTCA
Fosl1	GGTGCAAGTGGTTCAGCCCAAG	CAAGGTGGAACTTCTGCTGCTGG
Gapdh	CCAATGTGTCCGTCGTGGATCT	GTTGAAGTCGCAGGAGACAACC
Myc	GGTCCGACTCGCCTCACTCA	TTCCAACCGTCCGCTCACTC
Myh6	AGAAGCCCAGCGCTCCCTCA	GGGCGTTCTTGGCCTTGCCT
Myh7	GCGACTCAAAAAGAAGGACTTTG	GGCTTGCTCATCCTCAATCC
S100a6	GGGCCCGCTAAACTCCCTC	GGCTAGAAGAAGCGCACGGTC
Sox4	TGGGGTGATGCGTTTGGCATT	TCCACGAGGTCCCCATGTCC
Thbs1	CCTGCCCACCACGATTCACT	TCGCGGTTTGCACACCTGTT
Tmsb10	AATCTTCTGGGGCTAGCAGGC	CTTCCGCGAACGCCTCTCAA
